# Supplementary material for: Plectin reinforces vascular integrity by mediating vimentin-actin network crosstalk
Source: Oxford University Press journal article supplement (doi:10.1242/jcs.172056), 2015-01-01
Supplement: jcs172056supp.pdf [file jcs172056supp.pdf]

## SUPPLEMENTARY MATERIAL

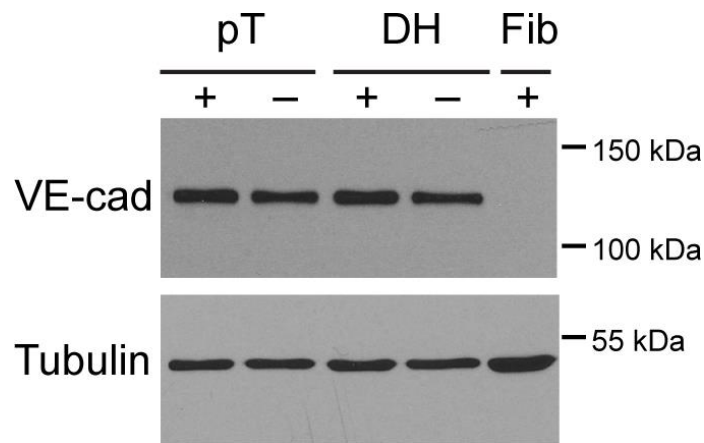

**Fig. S1. Characterization of immortalized endothelial wild-type (+) and plectin deficient (-) cell lines derived from kidney (pT) and lung (DH).** Protein extracts from pT and DH cell lines were analysed by immunoblotting using antibodies to VE-cadherin and tubulin (loading control). Cell extracts of cultured wild-type mouse fibroblasts were included as controls for VE-cadherin-negative cells (Fib). Note similar levels of VE-cadherin in all endothelial cell lines tested.

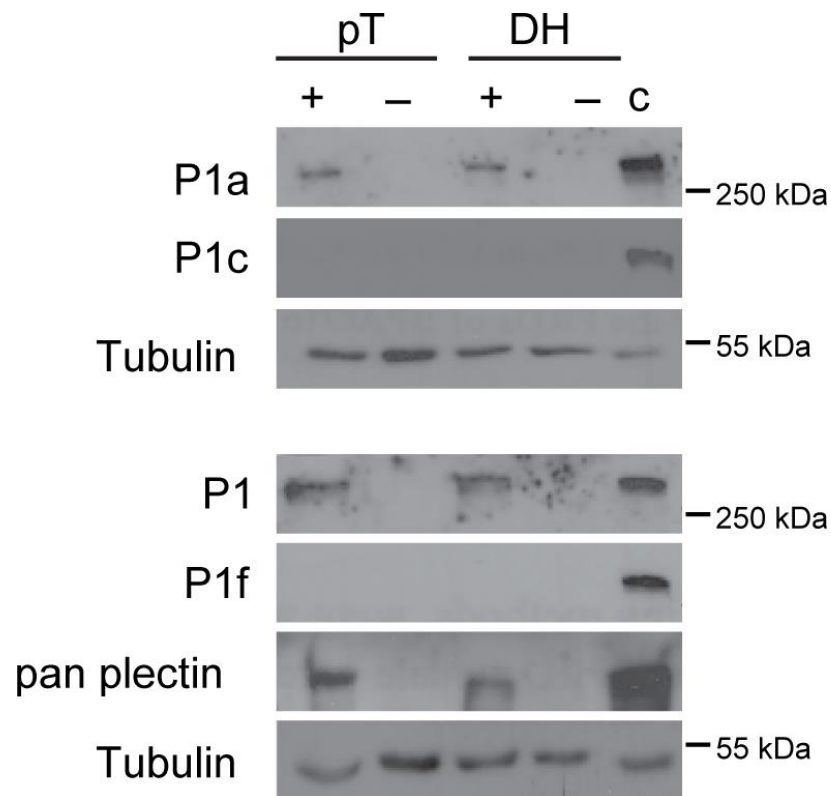

**Fig. S2. Expression pattern of plectin isoforms in wild-type (+) and plectin-deficient (-) endothelial cell lines.** Protein extracts of pT and DH cell lines were subjected to immunoblotting using affinity-purified, isoform-specific antibodies to P1, P1a, P1c, and P1f, and anti-pan plectin antiserum #9. Lysates of immortalized wild-type keratinocytes/fibroblasts served as positive controls (c) for plectin isoforms P1a and P1c/P1 and P1f, respectively. Tubulin, loading control.

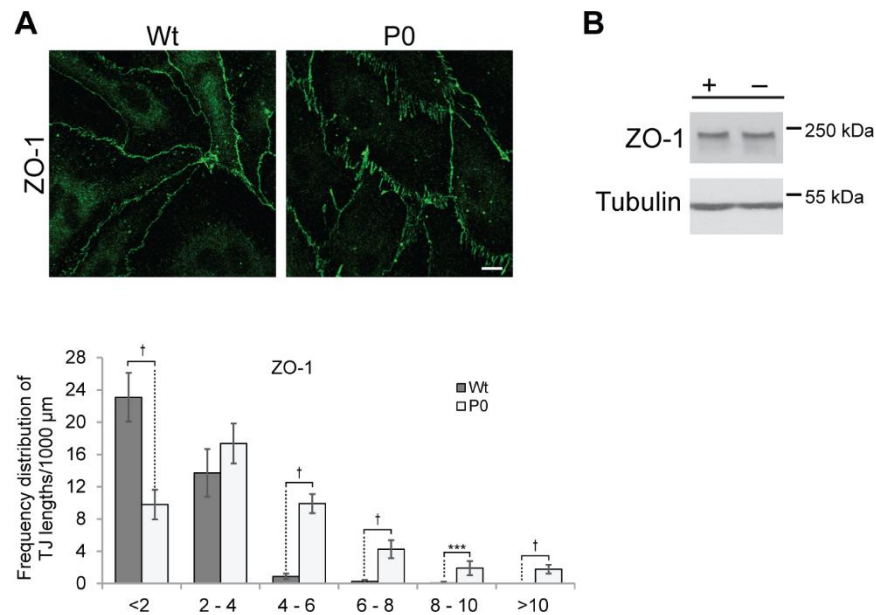

**Fig. S3 . Immunolocalization and expression levels of tight junction protein ZO-1 in Wt and P0 endothelial cells.** (A) Upper panels, confluent Wt and P0 endothelial cell layers (~24 h adhesion) were immunolabeled using antibodies to ZO-1. Scale bar, 10  $\mu$ m. Lower panel, bar graph showing spike lengths categorized and statistically evaluated as described in Fig. 2F. >1000 junctions were evaluated for each genotype, 3 independent experiments. \*\*\* $P$ <0.001,  $^{\dagger}P$ <0.0001. (B) Immunoblotting of Wt and P0 cell lysates using antibodies to ZO-1. Tubulin, loading control. Note equivalent protein levels of ZO-1 in both cell types.

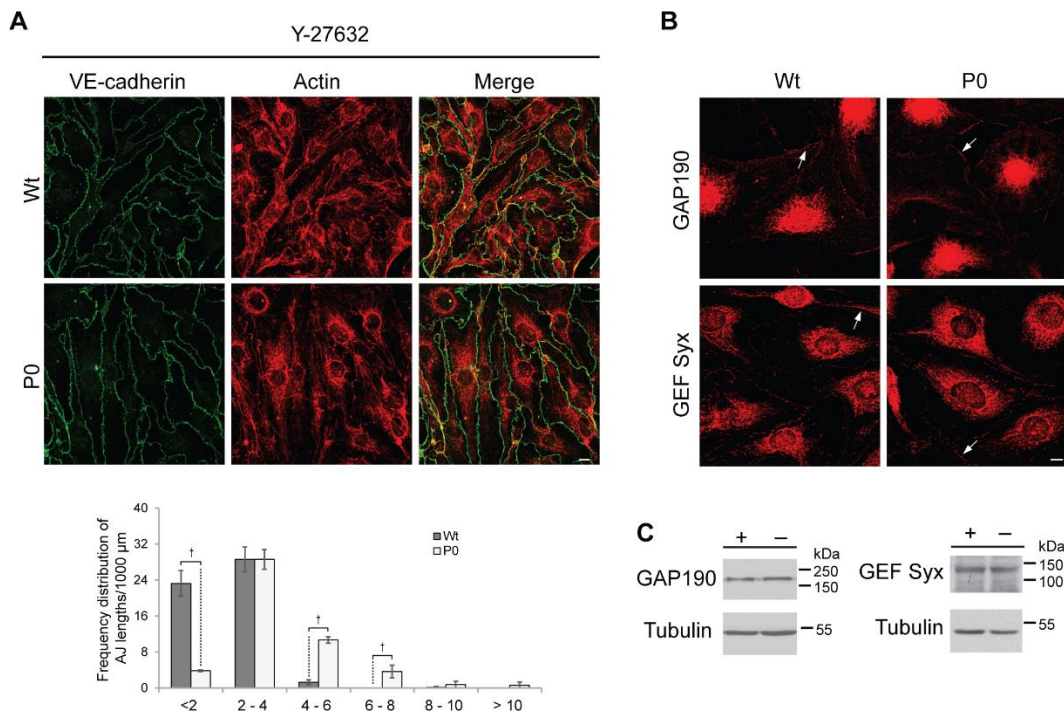

**Fig. S4. Unaltered levels and distribution of RhoA regulators GAP190 and GEF Syx in P0 cells and partial restoration of AJ discontinuity by Rho kinase inhibition.** (A) Double immunolabeling (VE cadherin and actin) of confluent Wt and P0 endothelial cell layers (~24 h adhesion) after treatment with 20 μM ROCK-inhibitor Y-27632 for 1 h. Scale bar, 10 μm. Bar graph shows AJ lengths categorized and statistically evaluated as described in Fig. 2F. >600 junctions were evaluated per genotype, 3 independent experiments. † $P < 0.0001$ . (B) Immunofluorescence microscopy of Wt and P0 cells using antibodies to GAP190 and GEF Syx. Arrows, cell-cell junctional areas. (C) Immunoblotting of Wt and P0 endothelial cell lysates using antibodies to GAP190 and GEF Syx. Tubulin, loading control.
